# Supplementary material for: Functionalized chitosan derivatives as nonviral vectors: physicochemical properties of acylated N,N,N-trimethyl chitosan/oligonucleotide nanopolyplexes
Source: Royal Society of Chemistry journal article supplement (doi:10.1039/c5sm01403d), 2015-01-01
Supplement: c5sm01403d1.pdf [file c5sm01403d1.pdf]

# Functionalized Chitosan Derivatives as Nonviral Vectors: Physicochemical Properties of Acylated *N,N,N*-trimethyl Chitosan/Oligonucleotide Nanopolyplexes

Joyce C. C. Santos, Pedro M. D. Moreno, Alexandra A. P. Mansur, Victoria Leiro,  
Herman S. Mansur, Ana Paula Pêgo

## Electronic Supplementary Information

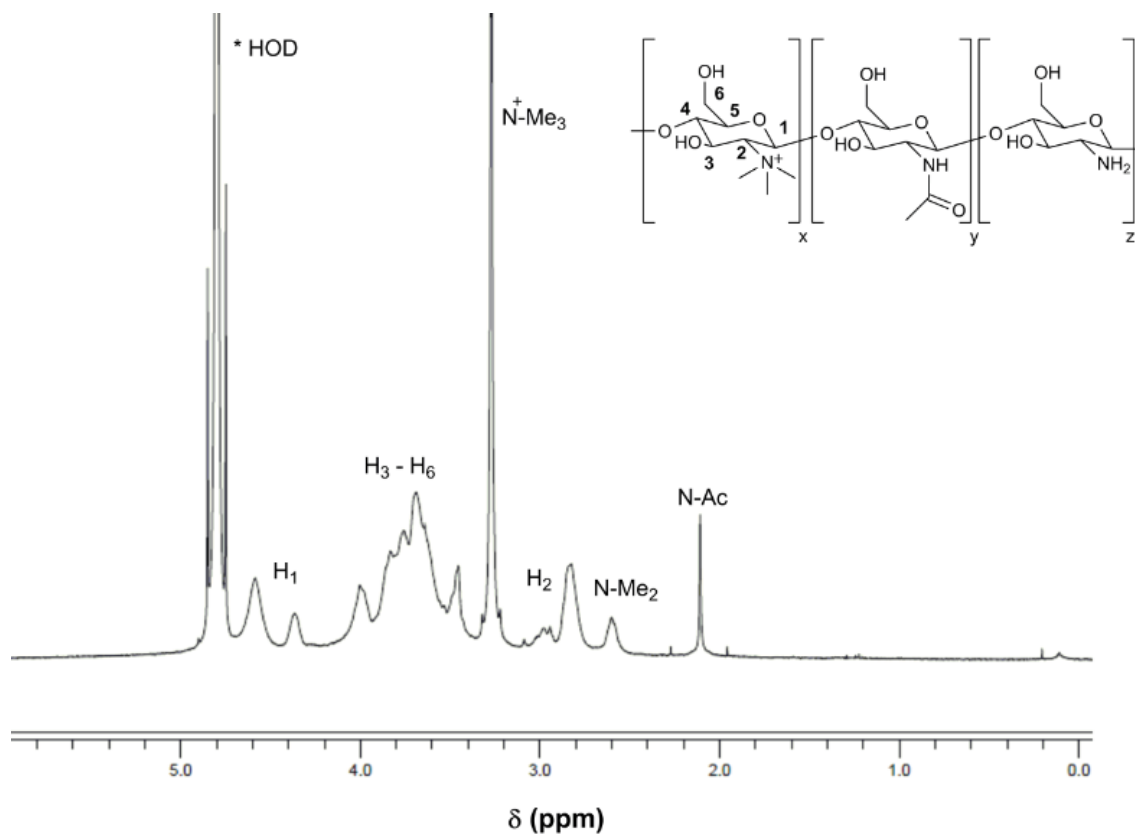

**Figure 1S.** <sup>1</sup>H-NMR spectra of TMC (D<sub>2</sub>O, 400 MHz).

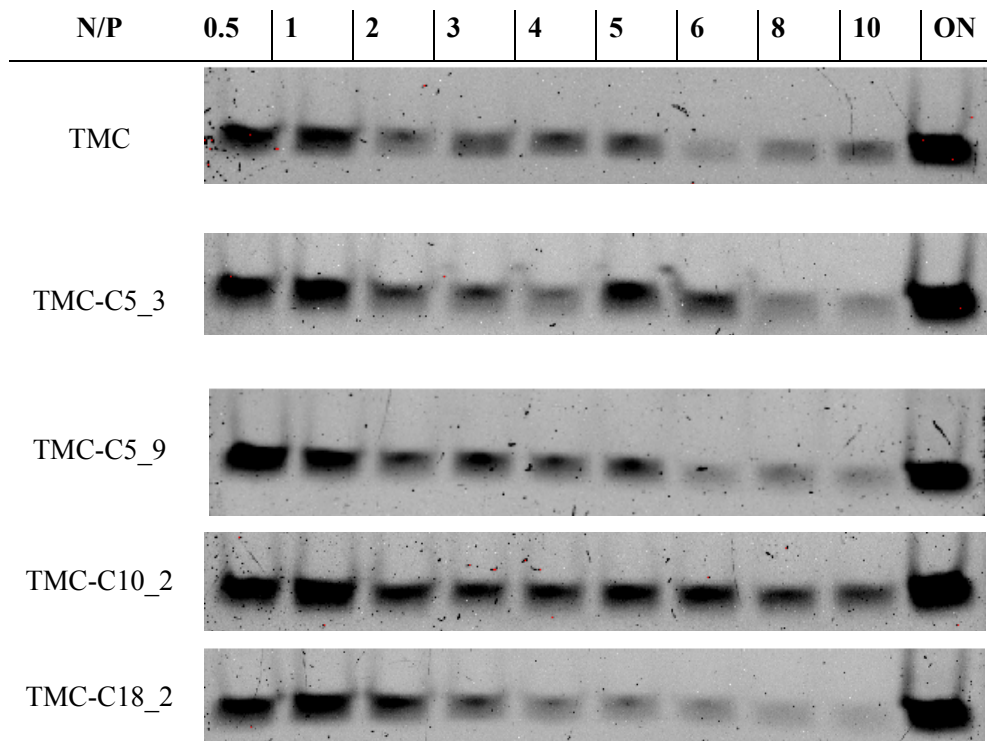

**Figure 2S.** Polyacrylamide gel electrophoresis was used to examine the oligonucleotide binding capacity of TMC/ssON polyplexes at different N/P ratios prepared in 20 mM HEPES buffer plus 5% m/v glucose, pH = 7.4.
